# Supplementary material
Source: publisher figshare collection journal article supplement (https://sage.figshare.com/ndownloader/files/15352715)
Supplement: Supplementary file 1 [file 15352715]

## Supplemental Material

### Application of ion chromatography coupled with mass spectrometry for human serum and urine metabolomics

By Yuchen Sun<sup>1</sup>, Kosuke Saito<sup>1</sup>, Ryota Iiji<sup>1</sup> and Yoshiro Saito<sup>1</sup>

<sup>1</sup>Division of Medical Safety Science, National Institute of Health Sciences, Kanagawa, Japan

Division of Medical Safety Science, National Institute of Health Sciences, Tonomachi 3-25-26, Kawasaki-ku, Kanagawa, 210-9501, JAPAN. Tel: +81-44-270-6628. E-mail: [saitok2@nihs.go.jp](mailto:saitok2@nihs.go.jp)

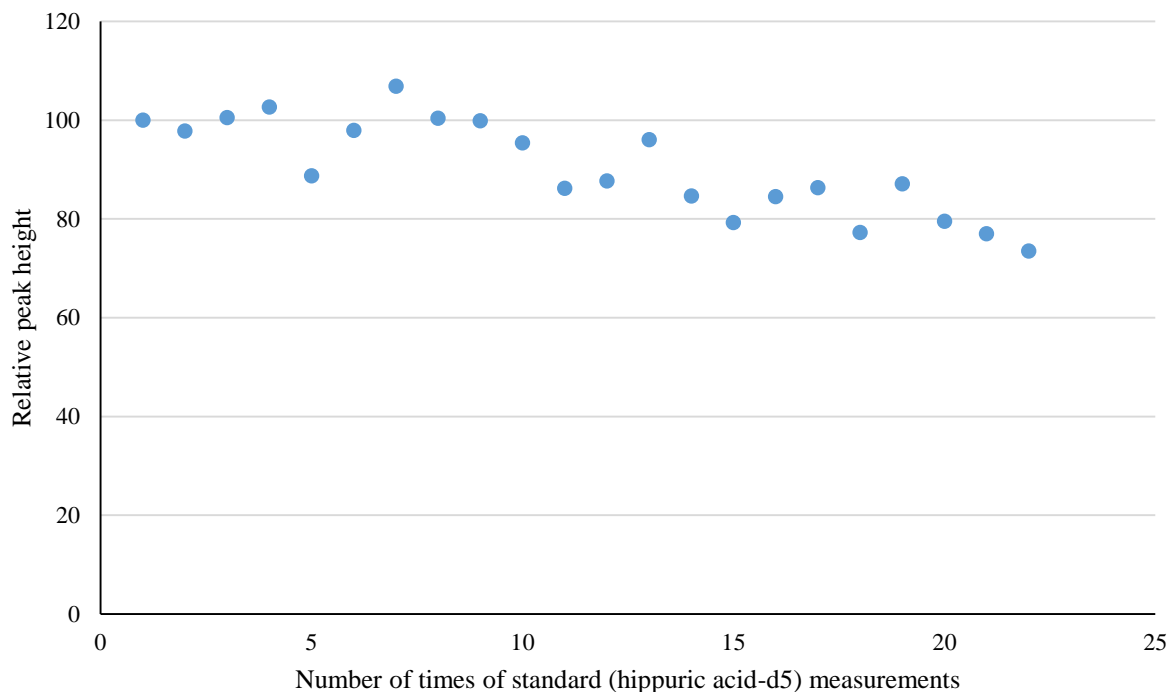

**Figure S1. Decrease of MS sensitivity after repeated injection of EDTA plasma samples.**

Standard sample (hippuric acid-d5) was continuously monitored after each measurement set of two each samples of EDTA plasma, serum and urine. The peak height of each standard sample was normalized by that of the first standard sample. The figure indicates slight decrease of MS sensitivity. After all measurements, the MS sensitivity of the last standard sample decreased by 27% compared to the first standard sample. No such desensitization was occurred in our measurements after exclusion of EDTA plasma samples (data not shown).

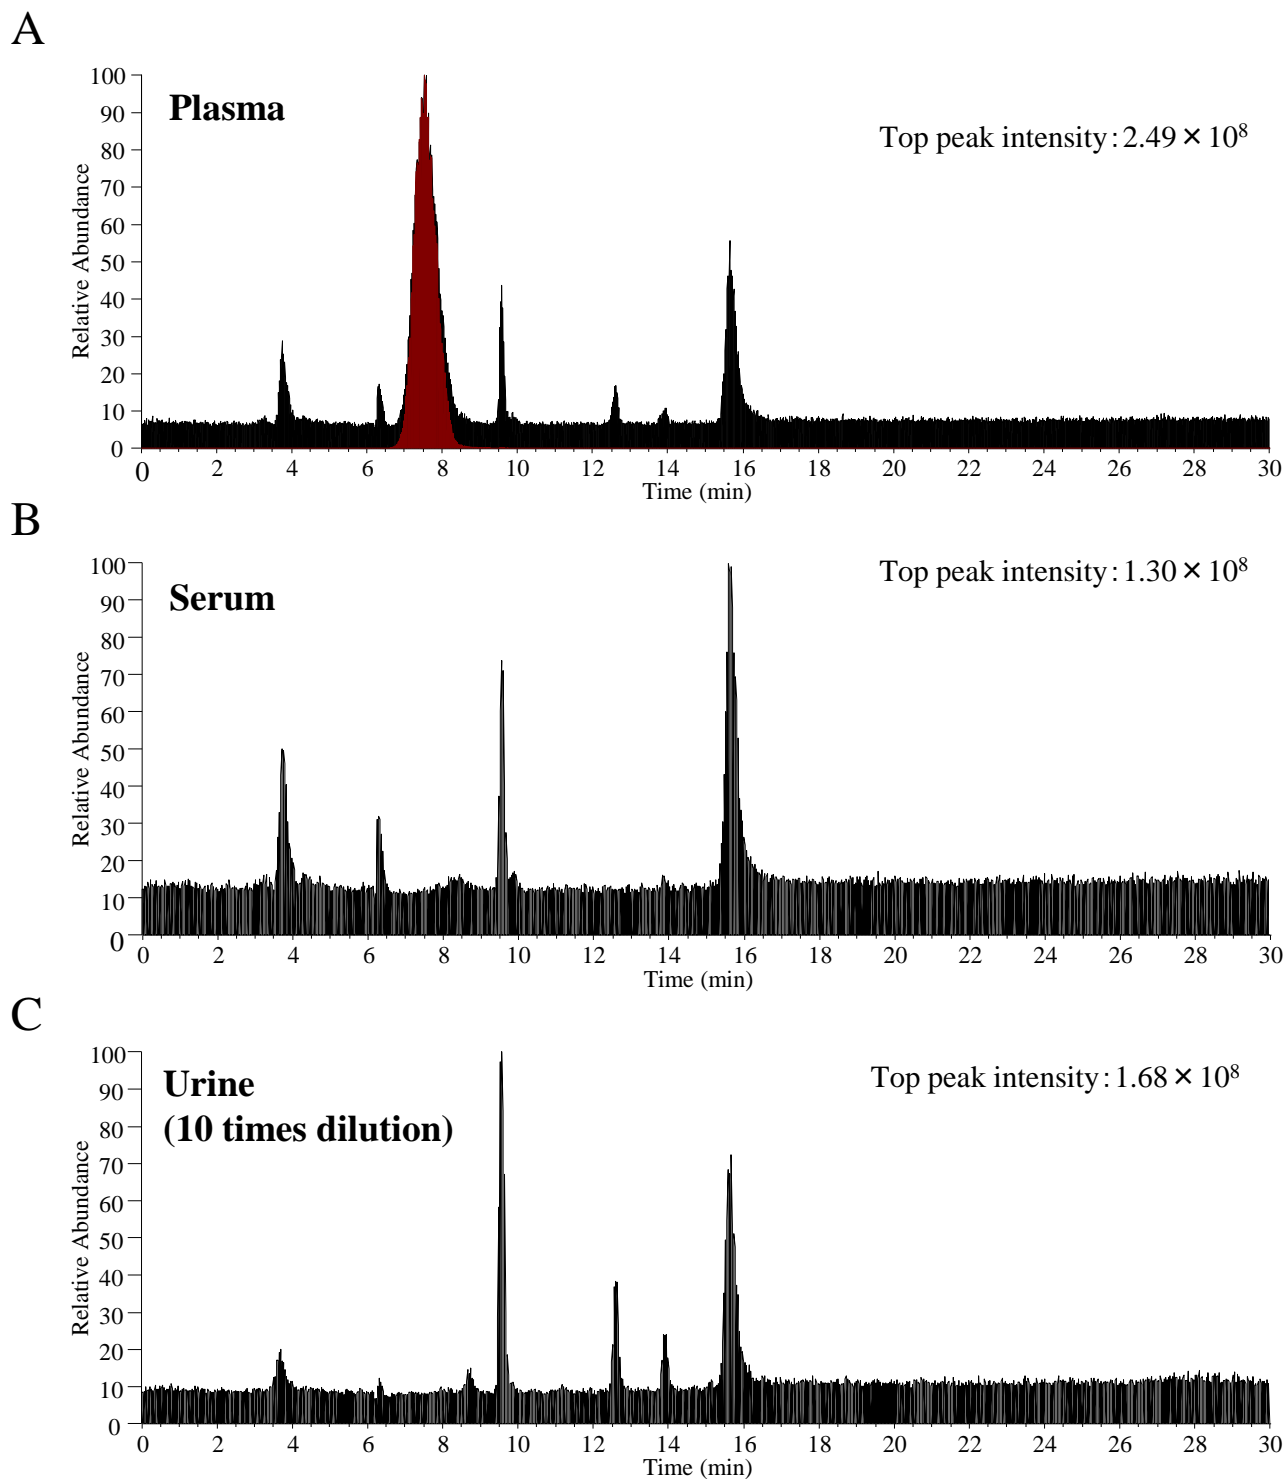

**Figure S2. Total ion chromatography of EDTA plasma, serum and urine specimens.**  
The representative total ion chromatography of a EDTA plasma (A), serum (B), or urine (C) from a male healthy volunteer is shown. The peak of EDTA in plasma is highlighted in red.
